# Supplementary material for: Circulating Cancer Associated Macrophage-like Cells as a Potential New Prognostic Marker in Pancreatic Ductal Adenocarcinoma
Source: MDPI journal article supplement (doi:10.3390/biomedicines10112955), 2022-11-17
Supplement: s1 [file s1]

**Supplementary Table S1: Correlation of CAML detection at follow-up with clinicopathological parameters in curative patients**

|                       |                      | CAML                            |      |                                         |       |              |
|-----------------------|----------------------|---------------------------------|------|-----------------------------------------|-------|--------------|
|                       |                      | none detected at follow-up n=12 |      | ≥ 1 CAML detected during follow-up n=10 |       | p-value      |
|                       |                      | n                               | %    | n                                       | %     |              |
| Age                   | ≤ 67 years           | 5                               | 41.7 | 7                                       | 70.0  | 0.231        |
|                       | > 67 years           | 7                               | 58.3 | 3                                       | 30.0  |              |
| Gender                | male                 | 3                               | 25.0 | 6                                       | 60.0  | 0.192        |
|                       | female               | 9                               | 75.0 | 4                                       | 40.0  |              |
| ECOG                  | 0                    | 4                               | 33.3 | 9                                       | 90.0  | <b>0.026</b> |
|                       | 1                    | 7                               | 58.3 | 1                                       | 10.0  |              |
|                       | 2                    | 1                               | 8.3  | 0                                       | 0.0   |              |
| Neoadjuvant treatment | no                   | 9                               | 75.0 | 6                                       | 60.0  | 0.652        |
|                       | yes                  | 3                               | 25.0 | 4                                       | 40.0  |              |
| Surgical procedure    | PD/PPPD              | 8                               | 66.7 | 7                                       | 70.0  | 0.896        |
|                       | left pancreatectomy  | 2                               | 16.7 | 2                                       | 20.0  |              |
|                       | total pancreatectomy | 2                               | 16.7 | 1                                       | 10.0  |              |
| Adjuvant treatment    | yes                  | 2                               | 16.7 | 0                                       | 0.0   | 0.481        |
|                       | no                   | 10                              | 83.3 | 10                                      | 100.0 |              |
| Dindo classification  | 0-2                  | 8                               | 66.7 | 4                                       | 40.0  | 0.391        |
|                       | 3-4                  | 4                               | 33.3 | 6                                       | 60.0  |              |
| pT stage              | T1-2                 | 6                               | 50.0 | 5                                       | 50.0  | 1.000        |
|                       | T3-4                 | 6                               | 50.0 | 5                                       | 50.0  |              |
| pN stage              | N0                   | 5                               | 41.7 | 1                                       | 10.0  | 0.162        |
|                       | N+ (N1/2)            | 7                               | 58.3 | 9                                       | 90.0  |              |
| Grading <sup>1</sup>  | G2                   | 7                               | 63.4 | 7                                       | 77.8  | 0.642        |
|                       | G3                   | 4                               | 36.6 | 2                                       | 22.2  |              |
| R status              | R0, CRM-             | 9                               | 75.0 | 7                                       | 70.0  | 1.000        |
|                       | R0, CRM+ / R1        | 3                               | 25.0 | 3                                       | 30.0  |              |

<sup>1</sup> For n=2 patients no grading (G) is available

|                            |           |   |      |   |      |       |
|----------------------------|-----------|---|------|---|------|-------|
| UICC                       | I-II      | 9 | 75.0 | 4 | 40.0 | 0.192 |
|                            | III       | 3 | 25.0 | 6 | 60.0 |       |
| Ca 19-9                    | ≤ 500U/ml | 9 | 75.0 | 8 | 80.0 | 1.000 |
|                            | > 500U/ml | 3 | 25.0 | 2 | 20.0 |       |
| Recurrence                 | no        | 6 | 50.0 | 1 | 10.0 | 0.074 |
|                            | yes       | 6 | 50.0 | 9 | 90.0 |       |
| CTC detection at follow-up | no        | 8 | 66.7 | 5 | 50.0 | 0.666 |
|                            | yes       | 4 | 33.3 | 5 | 50.0 |       |

ECOG, Eastern Cooperative Oncology Group; CRM, circumferential resection margin; Ca 19-9, Carbohydrate Antigen 19-9; UICC, Union for International Cancer Control; PD, partial pancreatoduodenectomy; PPPD, pylorus preserving pancreatoduodenectomy

**Supplementary Table S2: Patient characteristic and overall survival curative and palliative cohort including CAML detection**

| A) OS curative          |            |                   |                            |         | B) OS palliative        |           |      |                           |         |
|-------------------------|------------|-------------------|----------------------------|---------|-------------------------|-----------|------|---------------------------|---------|
|                         |            | n=33 <sup>§</sup> | Median OS, months (95% CI) | p-value |                         |           | n=19 | Median OS, month (95% CI) | p-value |
| Age                     | ≤ 67 years | 17                | 21.4 (18.9-20.0)*          | 0.603   | Age                     | ≤67 years | 9    | 17.0 (7.7-26.3)           | 0.023   |
|                         | > 67 years | 16                | 21.2 (15.9-24.4)*          |         |                         | >67 years | 10   | 3.0 (0.9-5.1)             |         |
| Gender                  | male       | 16                | 18.4 (14.1-22.7)*          | 0.030   | Gender                  | male      | 14   | 10.0 (4.6-1.1)            | 0.709   |
|                         | female     | 17                | 23.1 (21.4-24.8)*          |         |                         | female    | 5    | 11.8 (3.6-19.9)*          |         |
| ECOG                    | 0          | 20                | 13.4 (8.0-21.8)*           | 0.664   | ECOG                    | 0         | 5    | 17.0 (0-35.9)             | 0.571   |
|                         | 1          | 12                | 7.8 (2.3-14.1)*            |         |                         | 1         | 11   | 10.0 (0-20.6)             |         |
|                         | 2          | 33                | 9.0 (8.0-10.0)*            |         |                         | 2         | 3    | 5.0 (0-11.4)              |         |
| UICC stage              | I-II       | 26                | 22.0 (19.2-24.8)*          | 0.125   | UICC stage              | III       | 3    | 17.0 (0-36.2)             | 0.745   |
|                         | III        | 7                 | 14.8 (12.5-17.0)*          |         |                         | IV        | 16   | 10.0 (0.9-19.1)           |         |
| Ca 19-9                 | <500 U/ml  | 24                | 21.2 (18.2-24.2)*          | 0.991   | CAMLs detected at FUP # | no        | 5    | 5.0 (0-19.7)              | 0.220   |
|                         | ≥500 U/ml  | 9                 | 17.9 (14.9-20.8)*          |         |                         | yes       | 6    | 18.8 (14.9-22.6)*         |         |
| R-status                | R0; CRM-   | 17                | 18.2 (15.6-20.8)*          | 0.813   |                         |           |      |                           |         |
|                         | CRM+ /R1   | 16                | 21.5 (17.9-25.1)*          |         |                         |           |      |                           |         |
| Grading ~               | G2         | 21                | 20.0 (16.4-23.5)*          | 0.396   |                         |           |      |                           |         |
|                         | G3         | 9                 | 19.8 (17.6-21.9)*          |         |                         |           |      |                           |         |
| Neoadjuvant treatment   | no         | 26                | 20.7 (17.7-23.8)*          | 0.484   |                         |           |      |                           |         |
|                         | yes        | 7                 | 18.5 (17.6-19.4)*          |         |                         |           |      |                           |         |
| Adjuvant treatment      | no         | 4                 | 6.8 (0.7-12.8)*            | <0.001  |                         |           |      |                           |         |
|                         | yes        | 29                | 23 (21.2-24.8)*            |         |                         |           |      |                           |         |
| Clavien-Dindo           | 0-2        | 19                | 24.0 (22.1-25.9)*          | 0.054   |                         |           |      |                           |         |
|                         | 3-4        | 14                | 17.4 (15.3-19.6)*          |         |                         |           |      |                           |         |
| CAMLs detected at FUP # | no         | 12                | 19.6 (6.4-22.8)*           | 0.031   |                         |           |      |                           |         |
|                         | yes        | 10                | 7.0 (2.3-10.1)             |         |                         |           |      |                           |         |

A+B) Univariate analyses (p-values, log-rank test).

\* median not reached; mean was used; # FUP number of patients <sup>§</sup> n=3 perioperatively deceased patients not included in the analyses;

~ grading not available for n=3 patients

OS, overall survival; CI, confidence interval; ECOG, Eastern Cooperative Oncology Group; UICC, Union for International Cancer Control; CRM, circumferential resection margin; Ca 19-9, Carbohydrate Antigen 19-9.

**Supplementary Table S3. Ca19-9 values and CAML status in the FUP samples of the curative cohort.**

| Patient | Pre-OP<br>Ca19-9<br>U/ml | 3 month FUP |     | 6 month FUP |     | 9 month FUP |     | 12 +15 month<br>FUP |     | FUP<br>CAML<br>pos/neg | INCREASE<br>Ca19-9 at time of CAML<br>positivity | relapse | RFS<br>(months) |
|---------|--------------------------|-------------|-----|-------------|-----|-------------|-----|---------------------|-----|------------------------|--------------------------------------------------|---------|-----------------|
| UKE001  | 13                       | 8           | NEG | 18          | NEG |             |     | 21                  | NEG | NEG                    | both neg                                         | no      | 25              |
| UKE021  | 4                        | 5           | NEG |             |     | 6           | NEG |                     |     | NEG                    | both neg                                         | no      | 24              |
| UKE023  | 212                      |             |     |             |     | 58          | NEG |                     |     | NEG                    | n.e.                                             | no      | 21              |
| UKE058  | 49                       |             |     | 43          | NEG |             |     | 38                  | NEG | NEG                    | both neg                                         | no      | 15              |
| UKE037  | 1413                     | 38          | POS |             |     |             |     |                     |     | POS                    | CAML pos.                                        | no      | 18              |
| UKE077  | 7209                     | 16710       | NEG | 79          | NEG |             |     |                     |     | NEG                    | both neg                                         | no      | 16              |
| UKE092  | 37                       | 19          | NEG | n.a.        | NEG |             |     |                     |     | NEG                    | both neg                                         | no      | 13              |
| UKE020  | 2                        |             |     | 1           | NEG | 1           | POS |                     |     | POS                    | only CAML pos.                                   | yes     | 9               |
| UKE027  | 138                      | 9           | NEG | 11          | NEG |             |     |                     |     | NEG                    | both neg                                         | yes     | 12              |
| UKE032  | 73                       | 10          | POS | 26          | POS |             |     |                     |     | POS                    | CAML pos before Ca19-9                           | yes     | 12              |
| UKE076  | 3562                     |             |     | 115         | NEG | 13000       | NEG |                     |     | NEG                    | only Ca19-9 pos.                                 | yes     | 9               |
| UKE008  | 43                       | 53          | NEG | 4593        | NEG | 165         | NEG | n.a.                | POS | POS                    | Ca19-9 before CAML                               | yes     | 6               |
| UKE028  | 19                       | 16          | NEG | 736         | POS | 12          | POS |                     |     | POS                    | both pos at same time                            | yes     | 5               |
| UKE036  | 125                      | 84          | POS | 95          | POS |             |     |                     |     | POS                    | only CAML pos.                                   | yes     | 12              |
| UKE040  | 92                       | 264         | POS | 2010        | POS |             |     |                     |     | POS                    | both pos at same time                            | yes     | 10              |
| UKE049  | n.a.                     |             |     | 1           | NEG | 1           | NEG |                     |     | NEG                    | both neg                                         | yes     | 15              |
| UKE072  | 1380                     |             |     |             |     | 377         | POS |                     |     | POS                    | n.e.                                             | yes     | 9               |
| UKE016  | 37                       |             |     | 37          | NEG | 6           | NEG |                     |     | NEG                    | both neg                                         | yes     | 9               |
| UKE031  | 1474                     |             |     | 30          | NEG | 1334        | NEG |                     |     | NEG                    | only Ca19-9 pos.                                 | yes     | 12              |
| UKE056  | 47                       | 76          | POS | 180         | NEG | 570         | NEG |                     |     | POS                    | both pos at same time                            | yes     | 6               |
| UKE066  | 59                       | 647         | POS | 66          | POS |             |     |                     |     | POS                    | both pos at same time                            | yes     | 3               |
| UKE073  | 43                       | 20          | NEG | 24          | NEG |             |     |                     |     | NEG                    | both neg                                         | yes     | 12              |
|         |                          |             |     |             |     |             |     |                     |     |                        | n.a. : not evaluable                             |         |                 |
